# Supplementary material for: The Relationship of TPOAb and TGAb with Risk of Thyroid Nodules: A Large Epidemiological Study
Source: MDPI journal article supplement (doi:10.3390/ijerph14070723), 2017-07-05
Supplement: s1 [file s1]

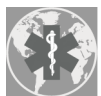

## The Relationship of TPOAb and TGAb with Risk of Thyroid Nodules: A Large Epidemiological Study

Weimin Xu, LiangliangHuo, Zexin Chen, Yangmei Huang, XingyiJin, Jing Deng, Sujuan Zhu, Yunxian Yu

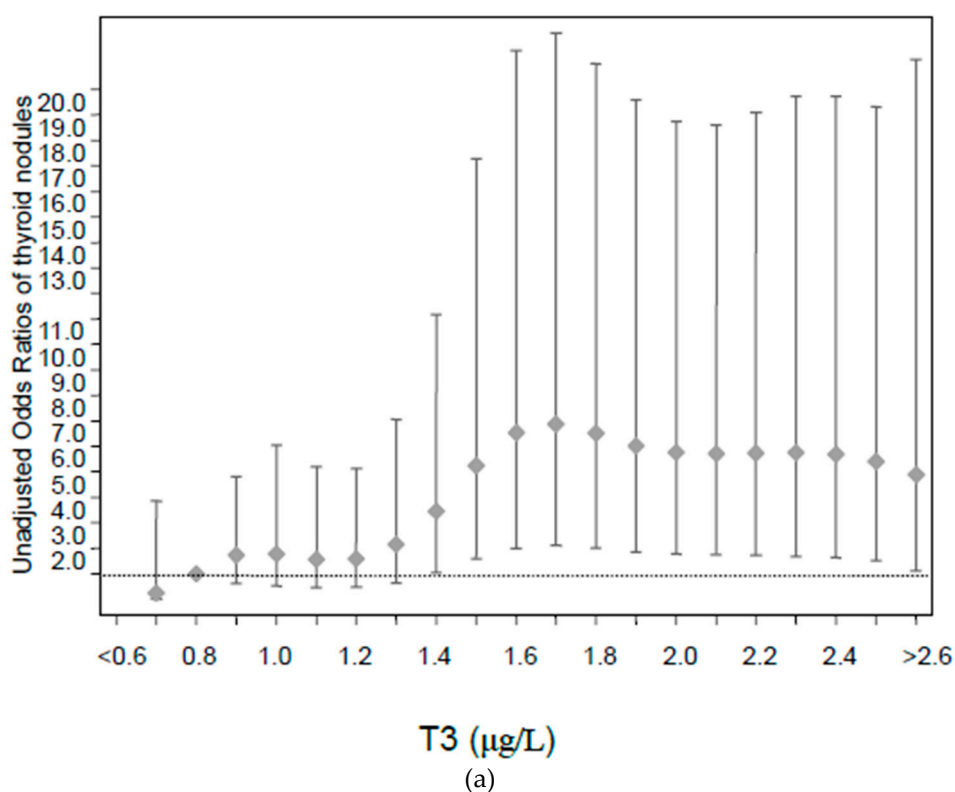

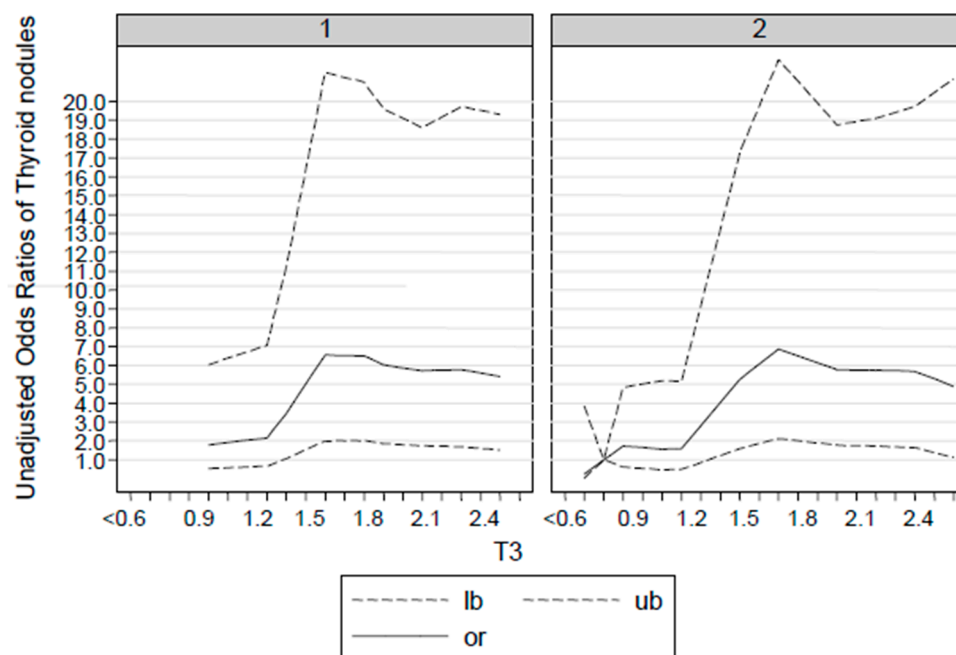

Graphs by sex

(b)

**Figure S1.** Unrestricted cubic splines with unadjusted odds ratios plotted for each level of T3. (a) This graph shows unadjusted ORs with 95% CI (capped spikes) for the relation of T3 to the occurrence of thyroid nodules in Chinese adult. T3 was modeled by unrestricted cubic splines with four knots at percentiles 20%, 40%, 60%, and 80% in a logistic regression model. The reference value is level 2. The level of T3 rang from level 1 to level 21. Level 1 represent the concentration under  $0.6\mu\text{g/L}$ , the level 21 represent the concentration over  $2.6\mu\text{g/L}$ . The gap between two levels was  $0.1\mu\text{g/L}$ . (b) This graph shows unadjusted ORs with 95% CI (capped spikes) for the relation of T3 to the occurrence of thyroid nodules in males and females of Chinese adult. The small figure1 shows the relation in males; the small figure2 shows the relation in females. T3 was modeled by unrestricted cubic splines with four knots at percentiles 20%, 40%, 60%, and 80% in a logistic regression model. The reference value is level 2. The level of T3 rang from level 1 to level 21. Level 1 represent the concentration under  $0.6\mu\text{g/L}$ , the level 21 represent the concentration over  $2.6\mu\text{g/L}$ . The gap between two levels was  $0.1\mu\text{g/L}$ .

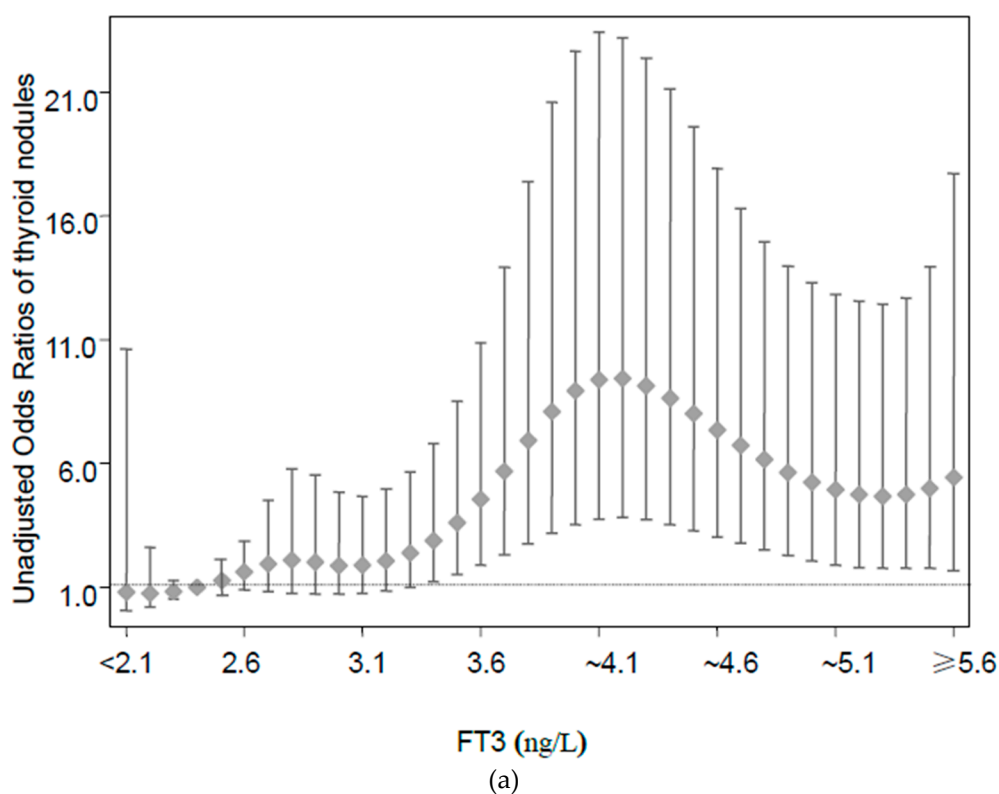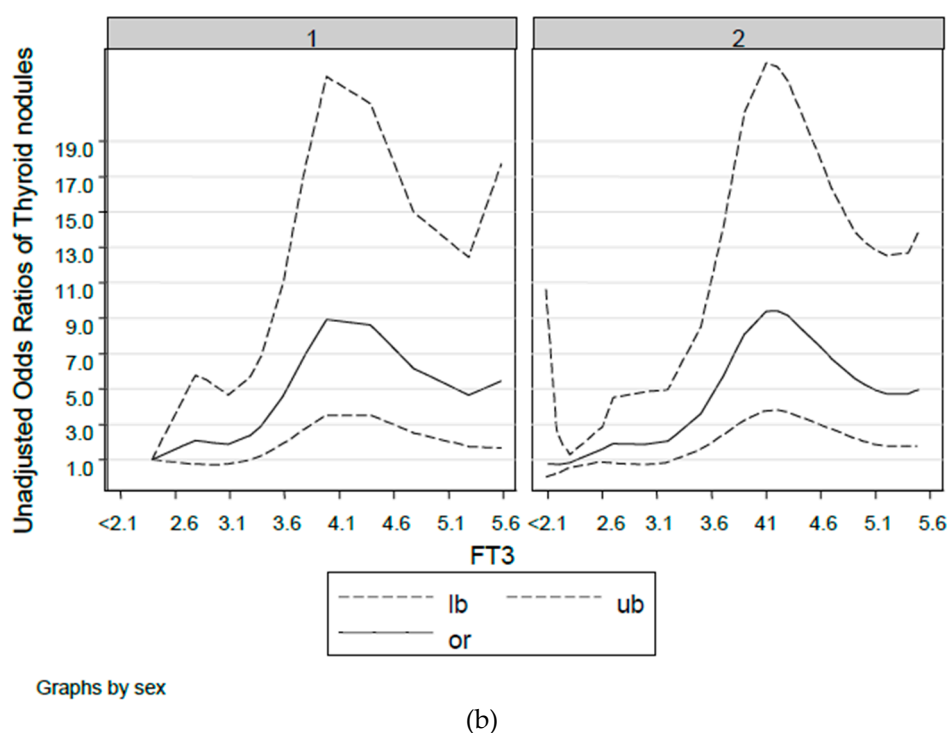

**Figure S2.** Unrestricted cubic splines with unadjusted odds ratios plotted for each level of FT3. (a) This graph shows unadjusted ORs with 95% CI (capped spikes) for the relation of FT3 to the occurrence of thyroid nodules in Chinese adult. FT3 was modeled by unrestricted cubic splines with four knots at percentiles 20%, 40%, 60%, and 80% in a logistic regression model. The reference value is level 3. The level of FT3 rang from level 1 to level 36. Level 1 represent the concentration between 2.1 $\mu$ g/L and 2.2ng/L, the level 36 represent the concentration over 5.6ng/L. The gap between two levels was 0.1ng/L. (b) This graph shows unadjusted ORs with 95% CI (capped spikes) for the relation of FT3 to the occurrence of thyroid nodules in males and females of Chinese adult. The small figure1 shows the relation in males; the small figure2 shows the relation in females. FT3 was modeled by unrestricted cubic splines with four knots at percentiles 20%, 40%, 60%, and 80% in a logistic

regression model. The reference value is level 3. The level of FT3 rang from level 1 to level 36. Level 1 represent the concentration between 2.1  $\mu\text{g/L}$  and 2.2  $\text{ng/L}$ , the level 36 represent the concentration over 6.0  $\text{ng/L}$ . The gap between two levels was 0.1  $\text{ng/L}$ .

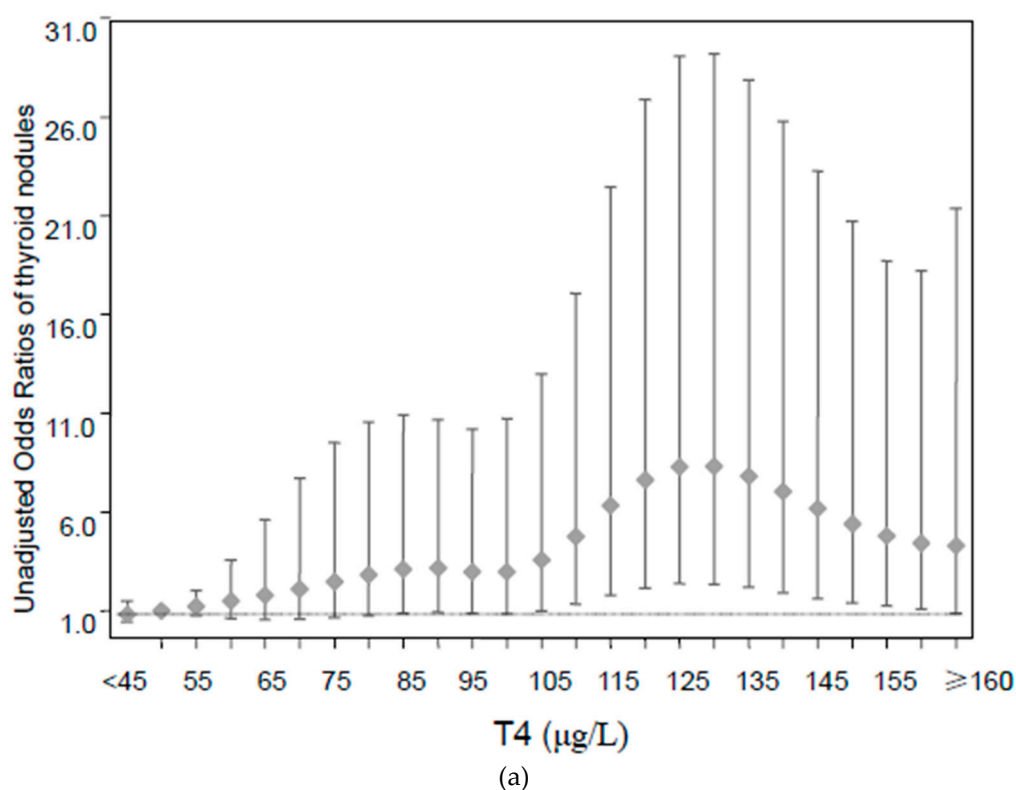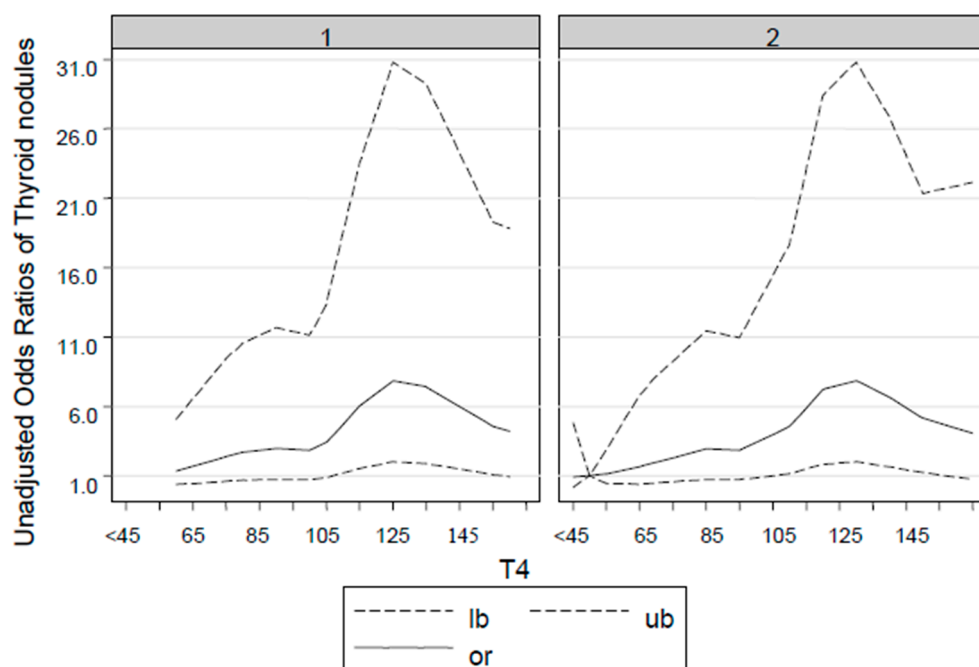

**Figure S3.** Unrestricted cubic splines with unadjusted odds ratios plotted for each level of T4. (a) This graph shows unadjusted ORs with 95% CI (capped spikes) for the relation of T4 to the occurrence of thyroid nodules in Chinese adult. T4 was modeled by unrestricted cubic splines with four knots at percentiles 20%, 40%, 60%, and 80% in a logistic regression model. The reference value is level 2. The level of T4 rang from level 1 to level 25. Level 1 represent the concentration under 45  $\mu\text{g/L}$ , the level

25 represent the concentration over  $160\mu\text{g/L}$ . The gap between two levels was  $5\mu\text{g/L}$ . (b) This graph shows unadjusted ORs with 95% CI (capped spikes) for the relation of T4 to the occurrence of thyroid nodules in males and females of Chinese adult. The small figure1 shows the relation in males; the small figure2 shows the relation in females. T4 was modeled by unrestricted cubic splines with four knots at percentiles 20%, 40%, 60%, and 80% in a logistic regression model. The reference value is level 2. The level of T4 rang from level 1 to level 25. Level 1 represent the concentration under  $45\mu\text{g/L}$ , the level 25 represent the concentration over  $160\mu\text{g/L}$ . The gap between two levels was  $5\mu\text{g/L}$ .

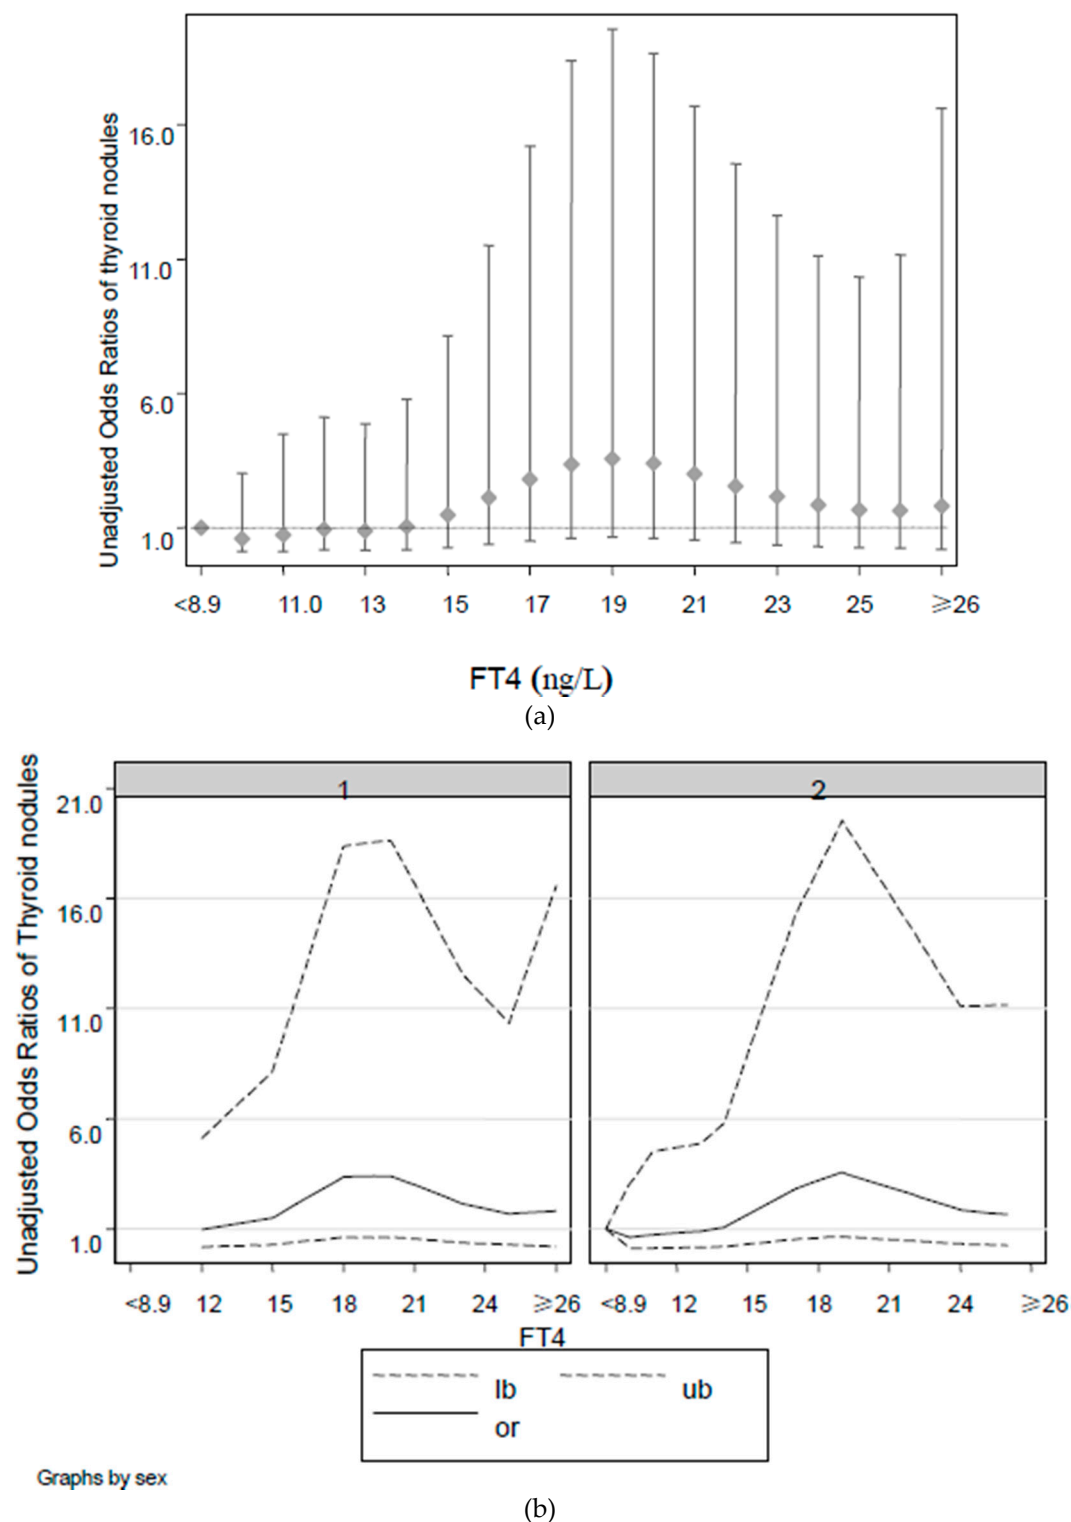

**Figure S4.** Unrestricted cubic splines with unadjusted odds ratios plotted for each level of FT4. (a) This graph shows unadjusted ORs with 95% CI (capped spikes) for the relation of FT4 to the

occurrence of thyroid nodules in Chinese adult. FT4 was modeled by unrestricted cubic splines with four knots at percentiles 20%, 40%, 60%, and 80% in a logistic regression model. The reference value is level 1. The level of FT4 rang from level 1 to level 19. Level 1 represent the concentration under 8.9ng/L, the level 19 represent the concentration over 26ng/L. The gap between two levels was 1ng/L. (b) This graph shows unadjusted ORs with 95% CI (capped spikes) for the relation of FT4 to the occurrence of thyroid nodules in males and females of Chinese adult. The small figure1 shows the relation in males; the small figure2 shows the relation in females. FT4 was modeled by unrestricted cubic splines with four knots at percentiles 20%, 40%, 60%, and 80% in a logistic regression model. The reference value is level 1. The level of FT4 rang from level 1 to level 19. Level 1 represent the concentration under 8.9ng/L, the level 19 represent the concentration over 26ng/L. The gap between two levels was 1ng/L.

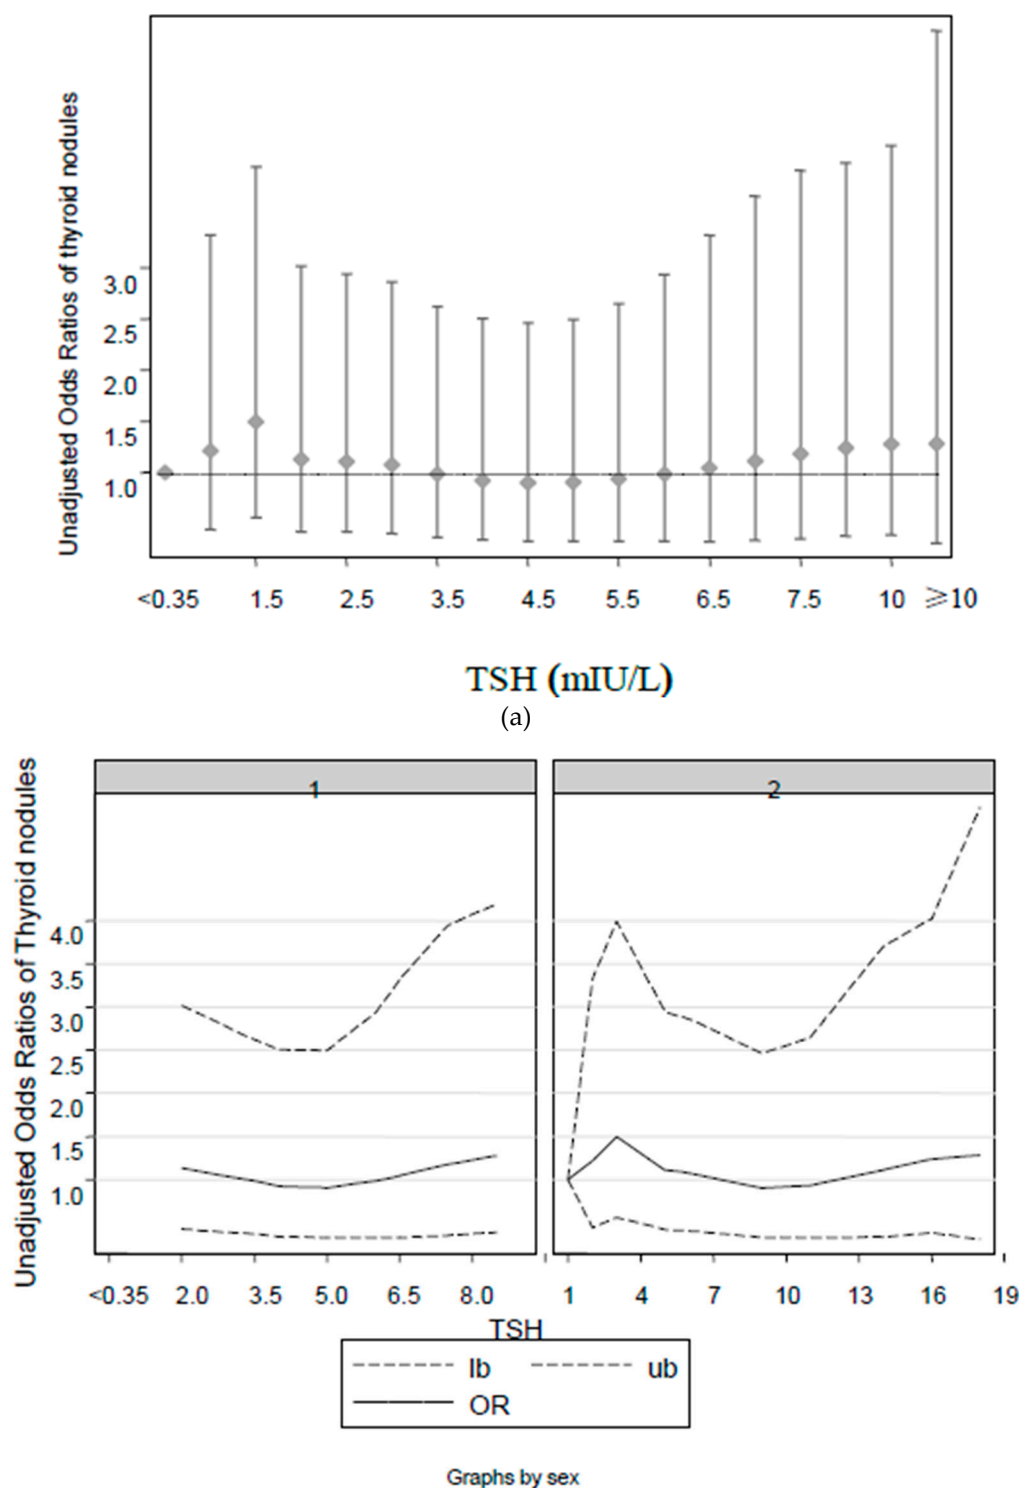

(b)

**Figure S5.** Unrestricted cubic splines with unadjusted odds ratios plotted for each level of TSH. (a) This graph shows unadjusted ORs with 95% CI (capped spikes) for the relation of TSH to the occurrence of thyroid nodules in Chinese adult. TSH was modeled by unrestricted cubic splines with four knots at percentiles 20%, 40%, 60%, and 80% in a logistic regression model. The reference value is level 1. The level of TSH rang from level 1 to level 18. Level 1 represent the concentration under 0.35mIU//L, the level 18 represent the concentration over 10mIU/L. The gap between two levels was 0.5mIU/ L. (b) This graph shows unadjusted ORs with 95% CI (capped spikes) for the relation of TSH to the occurrence of thyroid nodules in males and females of Chinese adult. The small figure1 shows the relation in males; the small figure2 shows the relation in females. TSH was modeled by unrestricted cubic splines with four knots at percentiles 20%, 40%, 60%, and 80% in a logistic regression model. The reference value is level 1. The level of TSH rang from level 1 to level 18. Level 1 represent the concentration under 0.35mIU//L, the level 18 represent the concentration over 10mIU/L. The gap between two levels was 0.5mIU/ L.

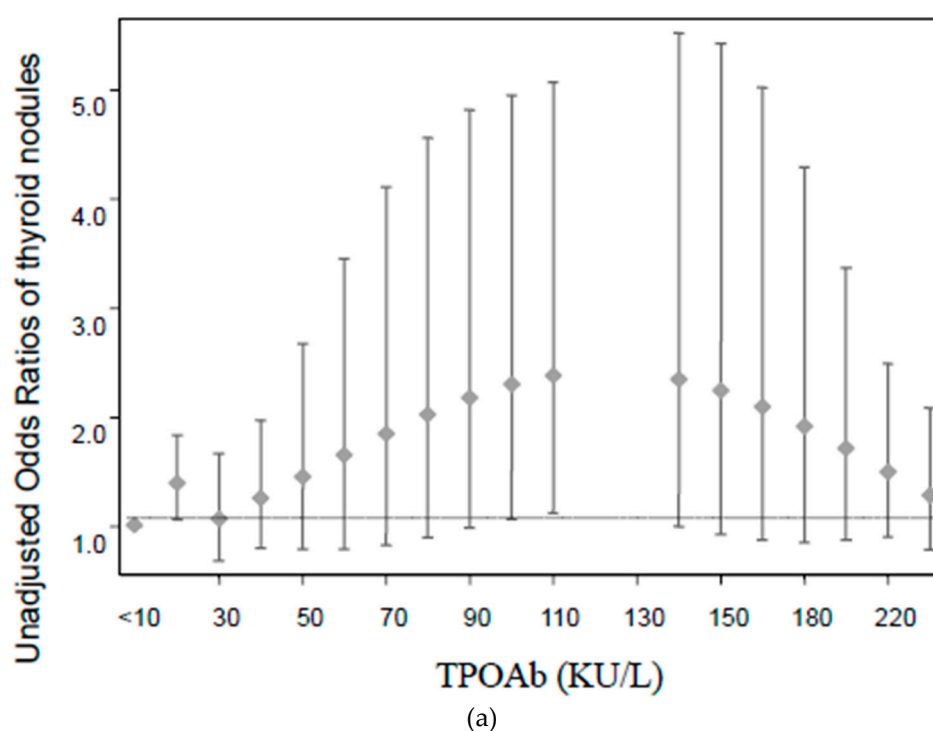

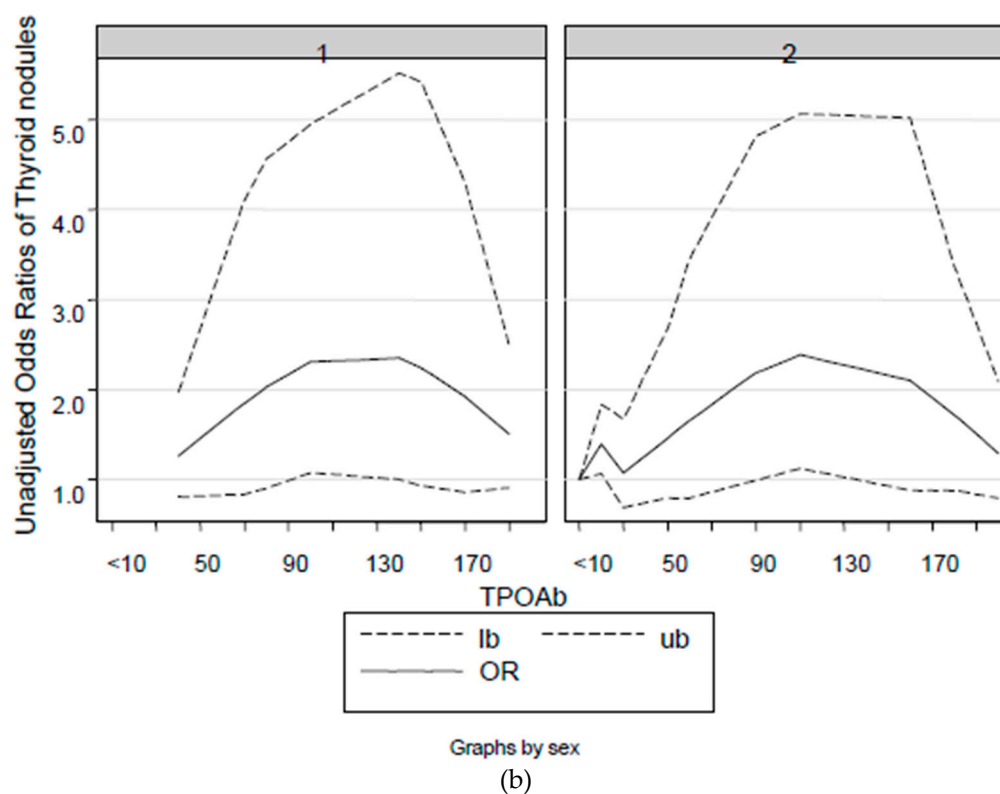

**Figure S6.** Unrestricted cubic splines with unadjusted odds ratios plotted for each level of TPOAb. (a) This graph shows unadjusted ORs with 95% CI (capped spikes) for the relation of TPOAb to the occurrence of thyroid nodules in Chinese adult. TPOAb was modeled by unrestricted cubic splines with four knots at percentiles 20%, 40%, 60%, and 80% in a logistic regression model. The reference value is level 1. The level of TPOAb rang from level 1 to level 20. Level 1 represent the concentration under 10KU//L, the level 20 represent the concentration over 220KU/L. The gap between two levels was 10KU/ L. (b) This graph shows unadjusted ORs with 95% CI (capped spikes) for the relation of TPOAb to the occurrence of thyroid nodules in males and females of Chinese adult. The small figure1 shows the relation in males; the small figure2 shows the relation in females. TPOAb was modeled by unrestricted cubic splines with four knots at percentiles 20%, 40%, 60%, and 80% in a logistic regression model. The reference value is level 1. The level of TPOAb rang from level 1 to level 20. Level 1 represent the concentration under 10KU//L, the level 20 represent the concentration over 220KU/L. The gap between two levels was 10KU/ L.



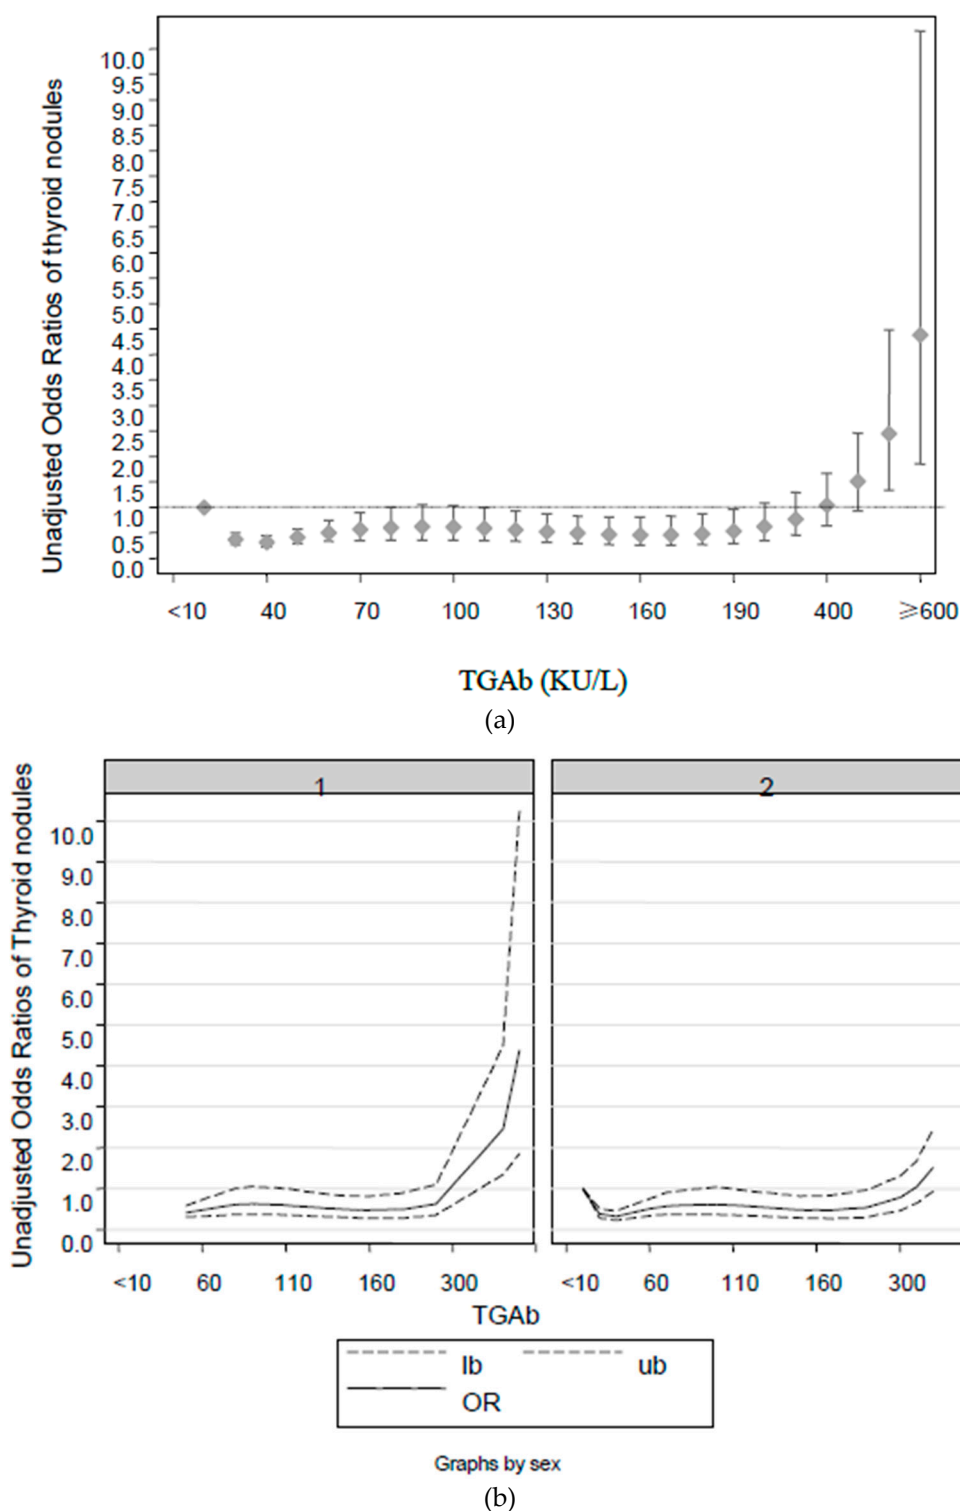

**Figure S7.** Unrestricted cubic splines with unadjusted odds ratios plotted for each level of TGAAb. (a) This graph shows unadjusted ORs with 95% CI (capped spikes) for the relation of TGAAb to the occurrence of thyroid nodules in Chinese adult. TPAAb was modeled by unrestricted cubic splines with four knots at percentiles 20%, 40%, 60%, and 80% in a logistic regression model. The reference value is level 1. The level of TGAAb rang from level 1 to level 25. Level 1 represent the concentration under 10KU//L, the level 20 represent the concentration over 600KU/L. The gap between two levels was 10KU/ L before level 21. The gap between two levels was 100KU/ L from 200KU/L. (b) This graph shows unadjusted ORs with 95% CI (capped spikes) for the relation of TGAAb to the occurrence of thyroid nodules in males and females of Chinese adult. The small figure1 shows the relation in males; the small figure2 shows the relation in females. TPAAb was modeled by unrestricted cubic splines with four knots at percentiles 20%, 40%, 60%, and 80% in a logistic regression model. The reference value

is level 1. The level of TGAbs ranged from level 1 to level 25. Level 1 represents the concentration under 10 KU/L, the level 20 represents the concentration over 600 KU/L. The gap between two levels was 10 KU/L before level 21. The gap between two levels was 100 KU/L from 200 KU/L.
